# Supplementary material
Source: MDPI journal article supplement (https://www.mdpi.com/2073-4433/12/1/52)
Supplement: s1 [file s1]

**Table 1.** Significance test results of the environmental parameters for six paired categories at the 0.05 significance level according to the procedure described in section 2. Categories are paired to test the significance of the differences between three types of severe convective events (i.e., hail, THWs, and SDHR). The letters “T” and “W” represent t tests and Wilcoxon–Mann–Whitney tests, respectively. “95%” (“–”) indicates that the difference of the paired category is significant (not significant) at the 0.05 significance level.

| Parameters | Pair (hail vs. THWs vs. SDHR) |               |               |            |            |            |
|------------|-------------------------------|---------------|---------------|------------|------------|------------|
|            | Hail mountain <sup>1</sup>    | Hail mountain | THWs mountain | Hail plain | Hail plain | THWs plain |
|            | THWs mountain                 | SDHR mountain | SDHR mountain | THWs plain | SDHR plain | SDHR plain |
| MUCAPE     | M/–                           | M/–           | M/–           | M/–        | M/95%      | M/95%      |
| LR85       | T/–                           | M/95%         | M/95%         | T/95%      | M/95%      | M/95%      |
| Thetase500 | M/95%                         | M/95%         | M/95%         | T/95%      | M/95%      | M/95%      |
| SHR3       | M/95%                         | M/95%         | M/95%         | M/95%      | M/95%      | M/95%      |
| SHR6       | M/95%                         | M/95%         | M/–           | M/95%      | M/95%      | M/95%      |
| DCAPE      | T/–                           | M/95%         | M/95%         | M/–        | M/95%      | M/95%      |
| PW         | M/95%                         | M/95%         | M/95%         | T/95%      | M/95%      | M/95%      |

<sup>1</sup> Refers to all hail events (i.e., both ordinary and significant hail) over the mountains. Similar for other categories in Table S1.

**Table S2.** Same as Table S1, but for the pairings of severe convective events over mountains and plains.

| Parameters | Pair (mountain vs. plain) |
|------------|---------------------------|
|------------|---------------------------|

|            | Ordinary hail<br>mountain | Ordinary THWs<br>mountain | Ordinary SDHR<br>mountain | Significant hail<br>mountain | Significant THWs<br>mountain | Significant SDHR<br>mountain |
|------------|---------------------------|---------------------------|---------------------------|------------------------------|------------------------------|------------------------------|
|            | Ordinary hail plain       | Ordinary THWs<br>plain    | Ordinary SDHR<br>plain    | Significant hail plain       | Significant THWs<br>plain    | Significant SDHR<br>plain    |
| MUCAPE     | M/95%                     | M/95%                     | M/95%                     | M/–                          | M/95%                        | M/95%                        |
| LR85       | T/95%                     | M/95%                     | M/95%                     | T/95%                        | T/95%                        | T/95%                        |
| Thetase500 | T/95%                     | M/95%                     | M/–                       | T/95%                        | T/–                          | M/95%                        |
| SHR3       | M/–                       | M/–                       | M/–                       | T/–                          | T/–                          | M/95%                        |
| SHR6       | M/–                       | M/–                       | M/–                       | T/–                          | T/–                          | T/–                          |
| DCAPE      | T/–                       | T/–                       | M/–                       | T/–                          | T/–                          | T/–                          |
| PW         | M/95%                     | M/95%                     | M/95%                     | M/95%                        | T/95%                        | M/95%                        |

**Table S3.** Same as Table S1, but for the pairings of ordinary and significant severe convective events.

| Pair (ordinary vs. significant) |                              |                              |                              |                        |                           |                           |
|---------------------------------|------------------------------|------------------------------|------------------------------|------------------------|---------------------------|---------------------------|
| Parameters                      | Ordinary hail<br>mountain    | Ordinary THWs<br>mountain    | Ordinary SDHR<br>mountain    | Ordinary hail plain    | Ordinary THWs<br>plain    | Ordinary SDHR<br>plain    |
|                                 | Significant hail<br>mountain | Significant THWs<br>mountain | Significant SDHR<br>mountain | Significant hail plain | Significant THWs<br>plain | Significant SDHR<br>plain |

|            |       |     |       |     |       |       |
|------------|-------|-----|-------|-----|-------|-------|
| MUCAPE     | M/95% | M/– | M/95% | M/– | M/95% | M/95% |
| LR85       | T/–   | M/– | M/95% | T/– | T/–   | M/–   |
| Thetase500 | T/–   | M/– | M/95% | T/– | T/–   | M/–   |
| SHR3       | M/–   | M/– | M/95% | T/– | M/–   | M/–   |
| SHR6       | M/–   | M/– | M/95% | M/– | M/–   | M/–   |
| DCAPE      | T/–   | T/– | M/95% | T/– | T/95% | M/–   |
| PW         | M/95% | M/– | M/95% | T/– | T/–   | M/95% |
